# Supplementary material for: A Carboxyl Group-Functionalized Ionic Liquid Hybrid Adsorbent for Solid-Phase Extraction and Determination of Trace Diclofenac Sodium in Milk Samples
Source: MDPI journal article supplement (doi:10.3390/molecules28176216), 2023-08-24
Supplement: s1 [file s1]

## Supplementary material

### **A Carboxyl Group-functionalized Ionic Liquid Hybrid Adsorbent for Solid-phase Extraction and Determination of Trace Diclofenac Sodium in Milk Samples**

Hongrui Yang<sup>a, b</sup>, Chen Wang<sup>a</sup>, Wenjuan Zhu<sup>a</sup>, Pingning Jin<sup>a</sup>, Fei Li<sup>a</sup>, Jing Fan<sup>a\*</sup>

<sup>a</sup> School of Environment, Key Laboratory of Yellow River and Huai River Water Environment and Pollution Control, Ministry of Education, Henan Key Laboratory for Environmental Pollution Control, Henan Normal University, Xinxiang, Henan 453007, PR China

<sup>b</sup> College of Chemical and Environmental Engineering, Xinjiang Institute of Engineering, Urumqi, 830023

## Table of contents:

1. **Table S1.** The isotherm model and its equations.
2. **Table S2.** The related parameters of various adsorption isotherm models.
3. **Table S3.** The recovery and enrichment factor of PS-IL-COOH at different concentrations of DS.
4. **Table S4.** Analytical performance of the proposed method in milk sample.
5. **Table S5.** Comparison for the extraction of DS by PS-IL-COOH and commercial adsorbents.
6. **Figure S1.** (A): The TGA curves of PS-CH<sub>2</sub>Cl (a) and PS-IL-COOH (b); (B): FT-TR spectra of PS-CH<sub>2</sub>Cl (a) and PS-IL-COOH (b).
7. **Figure S2.** Zeta potential of PS-IL-COOH
8. **Figure S3.** UV-visible adsorption spectra of original DS (a) and the recovered DS (b).
9. **Figure S4.** FT-IR spectra of the fresh PS-IL-COOH (a) and the regenerated PS-IL-COOH (b).
10. **Figure S5.** FT-IR spectra of the PS-IL-COOH (a), PS-IL-COOH-DS (b), and DS (c).
11. **Figure S6.** The photographs for different blank solutions and the adsorbed DS solution after addition of aqueous AgNO<sub>3</sub>: (a) deionized water, (b) aqueous DS solution, (c) supernatant after soaking of PS-IL-COOH, (d) supernatant after DS was adsorbed by PS-IL-COOH. Experimental conditions: C<sub>DS</sub>=100 mg/L, V<sub>DS</sub>=5 mL, m<sub>PS-IL-COOH</sub>=10 mg, time=30 min, pH≈6, room temperature.

**Table S1.** The isotherm model and its equations.

| Isotherm model | Equation                                                |     |
|----------------|---------------------------------------------------------|-----|
| Langmuir       | $\frac{C_e}{q_e} = \frac{C_e}{q_m} + \frac{1}{q_m K_L}$ | (1) |
| Freundlich     | $\ln q_e = \ln K_F + \frac{1}{n} \ln C_e$               | (2) |
| Tempkin        | $q_e = K_T \ln C_e + K_T \ln f$                         | (3) |

where  $q_e$  (mg/g) and  $q_m$  (mg/g) are, respectively, the equilibrium adsorption capacity and the maximum adsorption capacity.  $C_e$  (mg/L) stands for the equilibrium concentration of DS,  $K_L$ ,  $K_F$  and  $K_T$  are the constant of Langmuir, Freundlich and Tempkin, respectively, and  $f$  is the maximum binding energy.

**Table S2.** The related parameters of various adsorption isotherm models.

| Langmuir model        |              |        | Freundlich model |      |        | Tempkin model |      |        |
|-----------------------|--------------|--------|------------------|------|--------|---------------|------|--------|
| $K_L$ (L/mg)          | $q_m$ (mg/g) | $R^2$  | $K_F$            | $n$  | $R^2$  | $K_T$ (L/mg)  | $f$  | $R^2$  |
| $5.15 \times 10^{-4}$ | 965.3        | 0.9509 | 0.148            | 1.71 | 0.8791 | 139.4         | 11.3 | 0.9264 |

**Table S3.** The recovery and enrichment factor of PS-IL-COOH at different concentrations of DS.

| $V_{DS}$ (mL) | $C_i$ (μg/mL) | R%   | $C_f$ (μg/mL) | EF    | RSD (%) |
|---------------|---------------|------|---------------|-------|---------|
| 50.0          | 0.1           | 99.6 | 1.66          | 16.6  | 0.7     |
| 100.0         | 0.05          | 99.0 | 1.65          | 33.0  | 1.6     |
| 250.0         | 0.02          | 99.0 | 1.65          | 82.5  | 0.9     |
| 500.0         | 0.01          | 96.2 | 1.60          | 160.0 | 1.3     |
| 1000.0        | 0.005         | 94.2 | 1.57          | 314.0 | 1.2     |
| 2000.0        | 0.0025        | 93.0 | 1.55          | 620.0 | 2.1     |

Experimental conditions:  $m_{PS-IL-COOH}$  = 100 mg, pH≈6, room temperature.

**Table S4.** Analytical performance of the proposed method in milk sample.

| Parameter                | Obtained values      |
|--------------------------|----------------------|
| Calibration curve        | $y=0.03056x+0.00231$ |
| $R^2$                    | 0.9996               |
| LOD ( $\mu\text{g/mL}$ ) | 0.003                |
| LOQ ( $\mu\text{g/mL}$ ) | 0.01                 |
| Inter-day RSD, %         | 3.7                  |
| Intra-day RSD, %         | 2.9                  |
| Average Recovery, %      | 93 $\pm$ 3           |

**Table S5.** Comparison for the extraction of DS by PS-IL-COOH and commercial adsorbents.

| Adsorbent                | $C_{\text{initial DS}}=10 \text{ mg/L}$ |                      | $C_{\text{initial DS}}=1000 \text{ mg/L}$ |                      |
|--------------------------|-----------------------------------------|----------------------|-------------------------------------------|----------------------|
|                          | E%                                      | $q_e \text{ (mg/g)}$ | E%                                        | $q_e \text{ (mg/g)}$ |
| Activated carbon         | 44.0                                    | 4.40                 | 39.71                                     | 397.08               |
| Activated alumina        | 12.4                                    | 1.24                 | 11.72                                     | 117.21               |
| Silica gel               | 12.0                                    | 1.20                 | 10.94                                     | 109.39               |
| Artificial zeolite       | 4.70                                    | 0.47                 | 2.63                                      | 26.33                |
| Weak-base anion exchange | 43.1                                    | 4.31                 | 36.51                                     | 365.1                |
| PS-IL-COOH (this work)   | 100                                     | 10                   | 93.41                                     | 934.12               |

Experimental conditions:  $m_{\text{adsorbent}}=10 \text{ mg}$ ,  $V_{\text{initial DS}}=10 \text{ mL}$ ,  $t=30 \text{ min}$ ,  $\text{pH}\approx 6$ , room temperature.

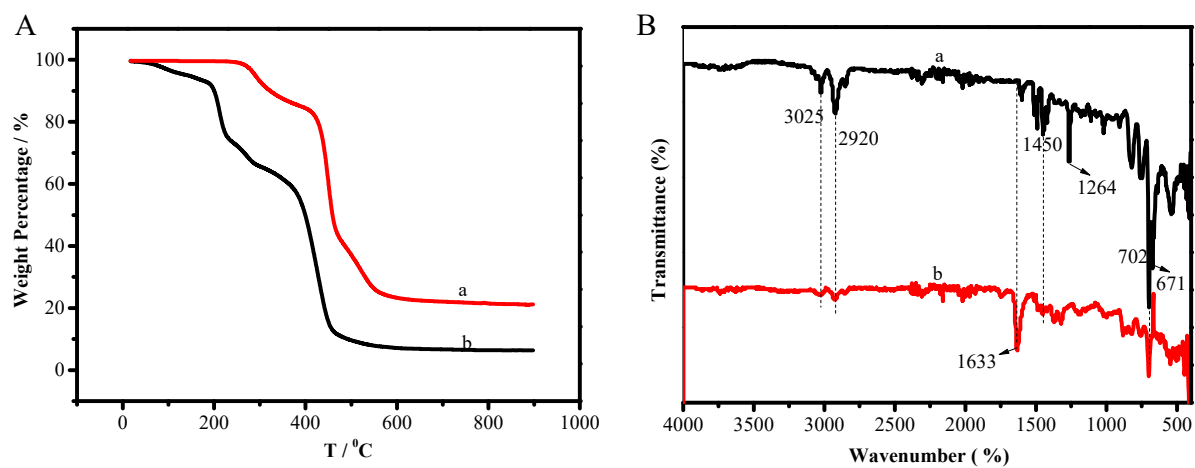

**Figure S1.** (A) The TGA curves of PS-CH<sub>2</sub>Cl (a), and PS-IL-COOH (b); (B) FT-TR spectra of PS-CH<sub>2</sub>Cl (a) and PS-IL-COOH (b).

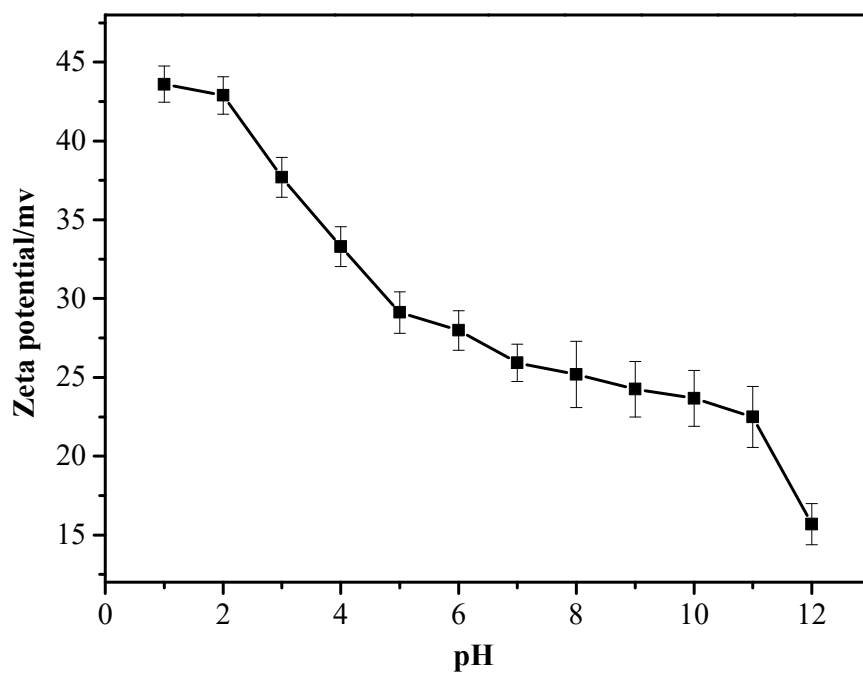

**Figure S2.** Zeta potential of PS-IL-COOH

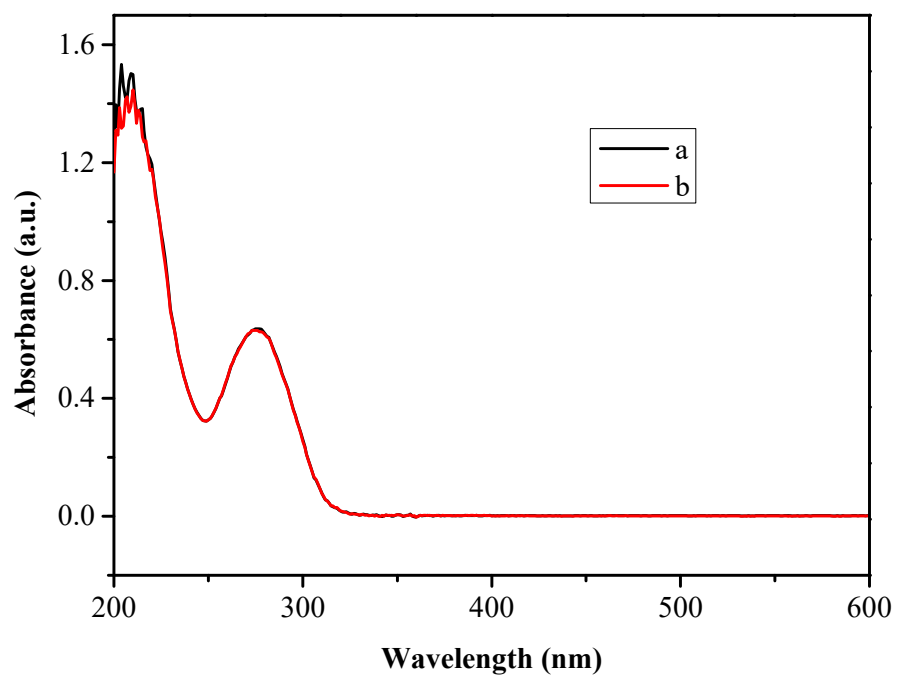

**Figure S3.** UV-visible adsorption spectra of the original DS (a) and the recovered DS (b).

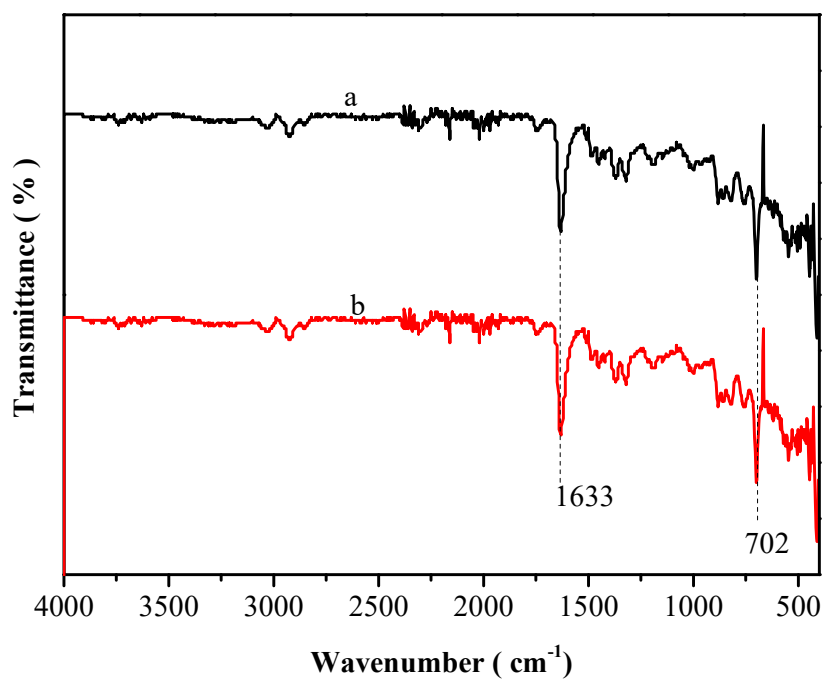

**Figure S4.** FT-IR spectra of the fresh PS-IL-COOH (a) and the regenerated PS-IL-COOH (b).

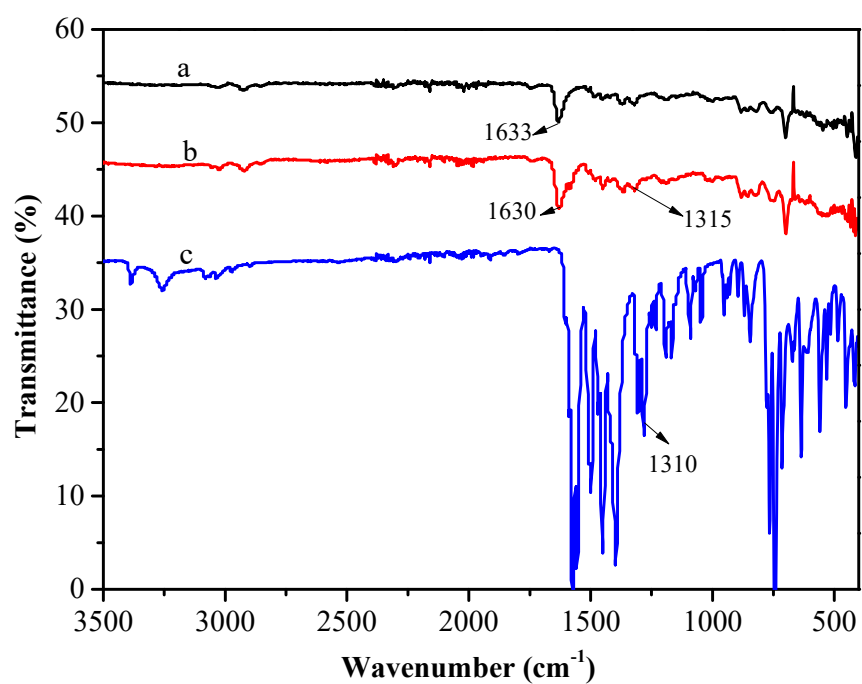

**Figure S5.** FT-IR spectra of the PS-IL-COOH (a), PS-IL-COOH-DS (b), and DS (c).

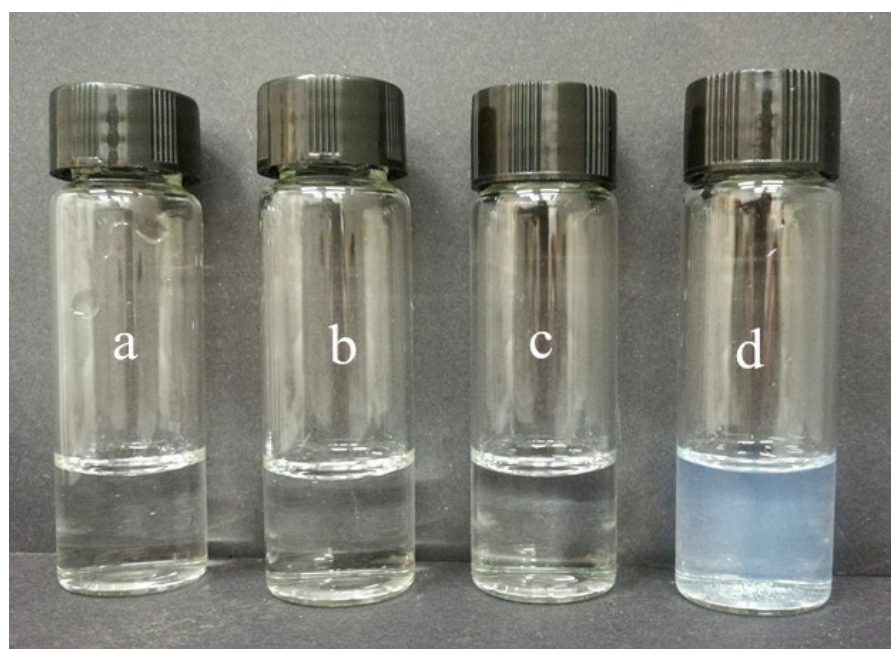

**Figure S6.** The photographs for different blank solutions and the adsorbed DS solution after addition of aqueous AgNO<sub>3</sub>: (a) deionized water, (b) aqueous DS solution, (c) supernatant after soaking of PS-IL-COOH, (d) supernatant after DS was adsorbed by PS-IL-COOH. Experimental conditions: C<sub>DS</sub>=100 mg/L, V<sub>DS</sub>=5 mL, m<sub>PS-IL-COOH</sub>=10 mg, time=30 min pH≈6, room temperature.
